# Supplementary material for: The influence of parenting styles and coping strategies on anxiety symptoms in adolescents: a comparative study of groups with and without non-suicidal self-injury behavior
Source: PeerJ. 2024 Nov 12;12:e18378. doi: 10.7717/peerj.18378 (PMC11566507; doi:10.7717/peerj.18378)
Supplement: Supplemental Information 3 [file peerj-12-18378-s003.xlsx]

## Sheet: Sheet1
Variable	Code	Description
Gender	1	Male
Gender	2	Female
Family_Harmony	1	Separated/Divorced
Family_Harmony	2	Violent Behavior
Family_Harmony	3	Arguments
Family_Harmony	4	Harmonious
Father_Education	1	Primary or Below
Father_Education	2	Middle School
Father_Education	3	High School
Father_Education	4	University or Above
Mother_Education	1	Primary or Below
Mother_Education	2	Middle School
Mother_Education	3	High School
Mother_Education	4	University or Above
Father_Occupation	1	Administrative
Father_Occupation	2	Technical Services
Father_Occupation	3	Worker
Father_Occupation	4	Arts
Father_Occupation	5	Farmer
Father_Occupation	6	Others
Mother_Occupation	1	Administrative
Mother_Occupation	2	Technical Services
Mother_Occupation	3	Worker
Mother_Occupation	4	Arts
Mother_Occupation	5	Farmer
Mother_Occupation	6	Others
Anxiety	0	Negative
Anxiety	1	Positive
Depression	0	Negative
Depression	1	Positive
